# Supplementary material for: E-Cigarette Aerosol Condensate Leads to Impaired Coronary Endothelial Cell Health and Restricted Angiogenesis
Source: MDPI journal article supplement (doi:10.3390/ijms24076378), 2023-03-28
Supplement: s1 [file s1]

## Supplementary Figure

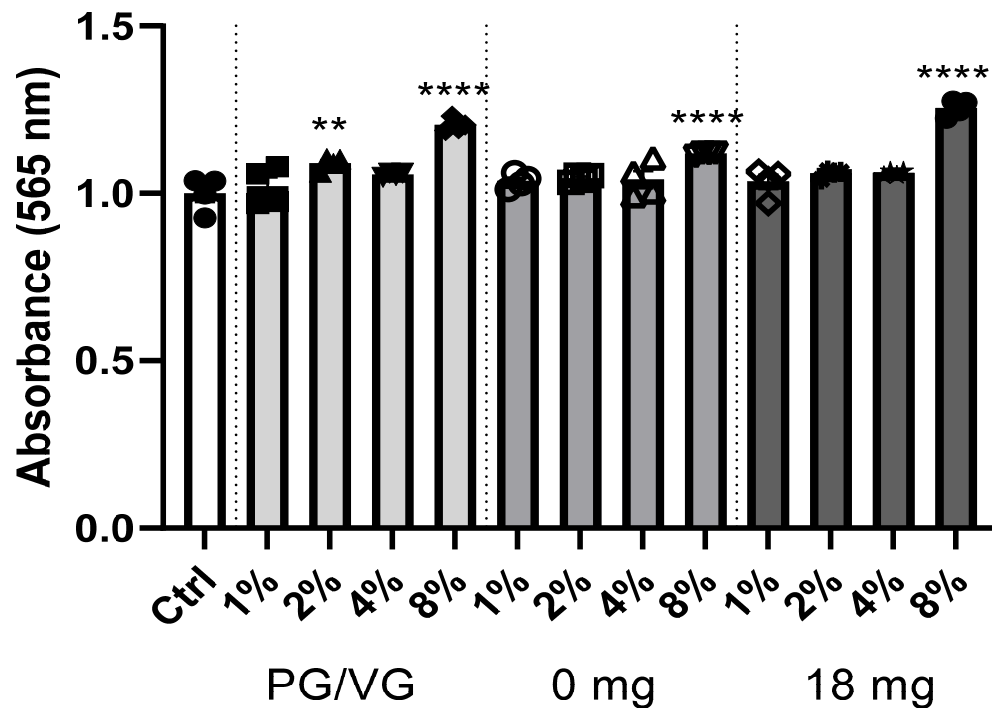

**Figure S1.** Absorbance of cell-free Endothelial Cell Growth Medium containing different concentrations of EAC after 3 hours of incubation with MTT reagent (10 µL of 5 mg/mL MTT). Results are expressed as mean  $\pm$  SEM (n=4). One-way ANOVA with Bonferroni post-tests was used for statistical analysis; \*\* $p < 0.01$ , \*\*\*\* $p < 0.0001$  versus Ctrl.
